# Supplementary material
Source: MDPI journal article supplement (https://www.mdpi.com/2073-4344/13/8/1183)
Supplement: s1 [file s1]

## Supplementary Materials

# Heterogeneous Copper Catalysts in the Aqueous Phase Hydrogenation of Maltose to Sorbitol

Valeria Pappalardo, Federica Zaccheria \*, Nicola Scotti and Nicoletta Ravasio

Consiglio Nazionale delle Ricerche (CNR), Istituto di Scienze e Tecnologie Chimiche "G. Natta", Via Golgi 19, 20133 Milano, Italy; valeria.pappalardo@scitec.cnr.it (V.P.); nicola.scotti@scitec.cnr.it (N.S.); nicoletta.ravasio@scitec.cnr.it (N.R.)

\* Correspondence: federica.zaccheria@scitec.cnr.it

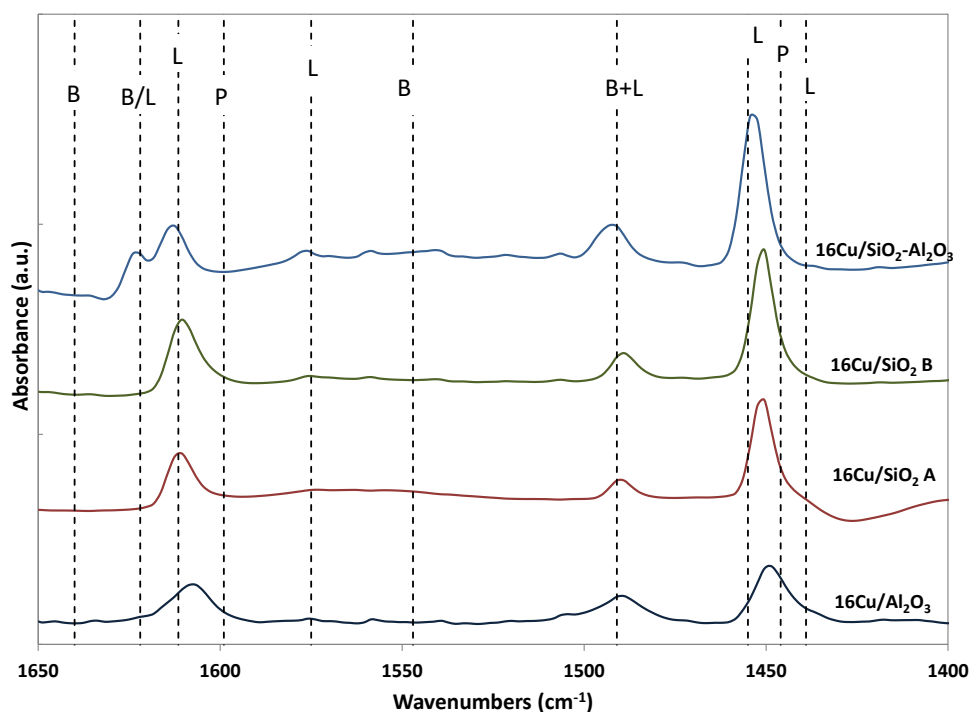

**Figure S1.** FT-IT of pyridine after desorption at 150 °C for the investigated Cu-based catalysts
